# Supplementary material for: Clinician Distribution and Type in Rural and Urban Areas of the National Health Services Corps
Source: PubMed Central journal article supplement (PMC11577137; doi:10.1001/jamanetworkopen.2024.45995), 2024-11-19
Supplement: jamanetwopen-e2445995-s001.pdf [file jamanetwopen-e2445995-s001.pdf]

## Supplemental Online Content

Baker O, Horvitz-Lennon M, Yu H. Clinician distribution and type in rural and urban areas of the National Health Services Corps. *JAMA Netw Open*. 2024;7(11):e2445995.  
doi:10.1001/jamanetworkopen.2024.45995

**eTable.** Classification of Clinician Types into Physician and Nonphysician Categories

This supplemental material has been provided by the authors to give readers additional information about their work.

eTable. Classification of Clinician Types into Physician and Nonphysician Categories

| Clinician Type                               | Specialty                      |
|----------------------------------------------|--------------------------------|
| <b>Primary Care Physicians</b>               |                                |
| Allopathic Physician                         | Family Practice                |
| Allopathic Physician                         | Family Practice - Geriatrics   |
| Allopathic Physician                         | Family Practice w/OB           |
| Allopathic Physician                         | Internal Medicine              |
| Allopathic Physician                         | Internal Medicine - Geriatrics |
| Allopathic Physician                         | None                           |
| Allopathic Physician                         | OB/GYN                         |
| Allopathic Physician                         | Pediatrics                     |
| Osteopathic Physician                        | Family Practice                |
| Osteopathic Physician                        | Family Practice - Geriatrics   |
| Osteopathic Physician                        | Family Practice w/OB           |
| Osteopathic Physician                        | General Practice               |
| Osteopathic Physician                        | Internal Medicine              |
| Osteopathic Physician                        | Internal Medicine - Geriatrics |
| Osteopathic Physician                        | OB/GYN                         |
| Osteopathic Physician                        | Pediatrics                     |
| <b>Primary Care Non-Physician Clinicians</b> |                                |
| Chiropractor                                 | None                           |
| Clinical Nurse Specialist                    | None                           |
| Nurse Practitioner                           | Adult                          |
| Nurse Practitioner                           | Family Practice                |
| Nurse Practitioner                           | Geriatrics                     |
| Nurse Practitioner                           | None                           |
| Nurse Practitioner                           | Pediatrics                     |
| Nurse Practitioner                           | Womens Health                  |
| Pharmacist                                   | None                           |
| Physician Assistant                          | Adult                          |
| Physician Assistant                          | Family Practice                |
| Physician Assistant                          | None                           |
| Physician Assistant                          | Pediatrics                     |
| Pharmacist                                   | None                           |
| Physician Assistant                          | Adult                          |
| Physician Assistant                          | Family Practice                |
| Physician Assistant                          | None                           |
| Physician Assistant                          | Pediatrics                     |
| Physician Assistant                          | Womens Health                  |
| Registered Nurse                             | None                           |
| Registered Nurse Anesthetist                 | None                           |

|                                                    |                         |
|----------------------------------------------------|-------------------------|
| Nurse Anesthetist                                  | None                    |
| Certified Nurse Anesthetist                        | None                    |
| Certified Nurse Midwife                            | None                    |
| <b>Mental Health Care Physicians</b>               |                         |
| Allopathic Physician                               | Mental Health           |
| Osteopathic Physician                              | Mental Health           |
| <b>Mental Health Care Non-Physician Clinicians</b> |                         |
| Health Service Psychologist                        | None                    |
| Licensed Clinical Social Worker                    | None                    |
| Licensed Professional Counselor                    | None                    |
| Marriage and Family Therapist                      | None                    |
| Nurse Practitioner                                 | Psychiatry              |
| Physician Assistant                                | Psychiatry              |
| Psychiatric Nurse Specialist                       | Adult                   |
| Psychiatric Nurse Specialist                       | None                    |
| Psychiatric Nurse Specialist                       | Pediatrics              |
| Substance Use Disorder Counselor                   | None                    |
| State Licensed or Certified SUD Counselor          | None                    |
| <b>Dentists</b>                                    |                         |
| Dentist                                            | General Practice        |
| Dentist                                            | Geriatrics              |
| Dentist                                            | None                    |
| Dentist                                            | Pediatrics              |
| Dentist                                            | Public Health Dentistry |
| <b>Dental Hygienist</b>                            |                         |
| Registered Dental Hygienist                        | None                    |
