# Supplementary material for: Clinician Distribution and Type in Rural and Urban Areas of the National Health Services Corps
Source: PubMed Central journal article supplement (PMC11577137; doi:10.1001/jamanetworkopen.2024.45995), 2024-11-19
Supplement: jamanetwopen-e2445995-s002.pdf [file jamanetwopen-e2445995-s002.pdf]

## Data Sharing Statement

### Data

**Data available:** No

### Additional Information

**Explanation for why data not available:** Both the HRSA Quarterly Summary and the NHSC field strength data are publicly available at <https://data.hrsa.gov/data/downloadand>
